# Supplementary material for: Molecular Dynamics Study of the Conformation, Ion Adsorption, Diffusion, and Water Structure of Soluble Polymers in Saline Solutions
Source: MDPI journal article supplement (doi:10.3390/polym13203550), 2021-10-14
Supplement: s1 [file s1]

# Supplementary Information: Molecular Dynamics Study of the Conformation, Ion Adsorption, Diffusion and Water Structure of Soluble Polymers in Saline Solutions

Gonzalo R. Quezada, Norman Toro, Jorge Saavedra, Pedro Robles, Iván Salazar, Alessandro Navarra and Ricardo I. Jeldres

In this support information document, we include the partial charges of all polymers from the study. The Tables S1–S6 are based on the index from the figures S1–S5. The table S7 define the atom type of the forcefield.

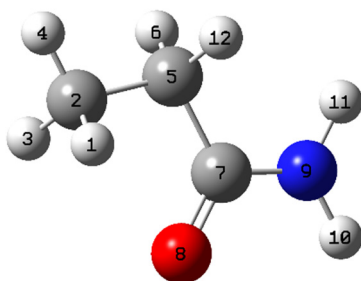

**Figure S1.** Acrylamide monomer.

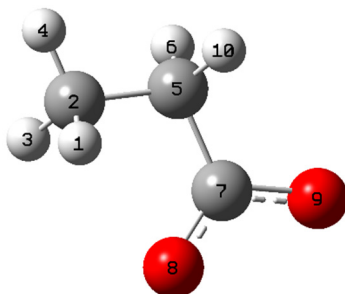

**Figure S2.** Acrylate monomer.

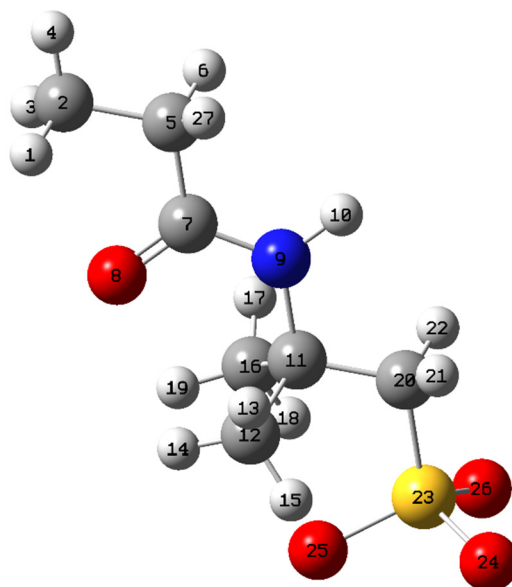

**Figure S3.** Acrylamido-2-methyl-1-propanesulfonic monomer.

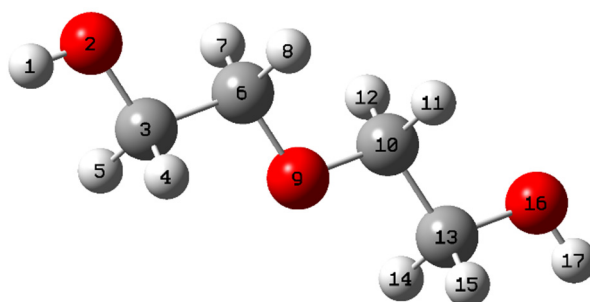

**Figure S4.** Ethylene oxide monomer.

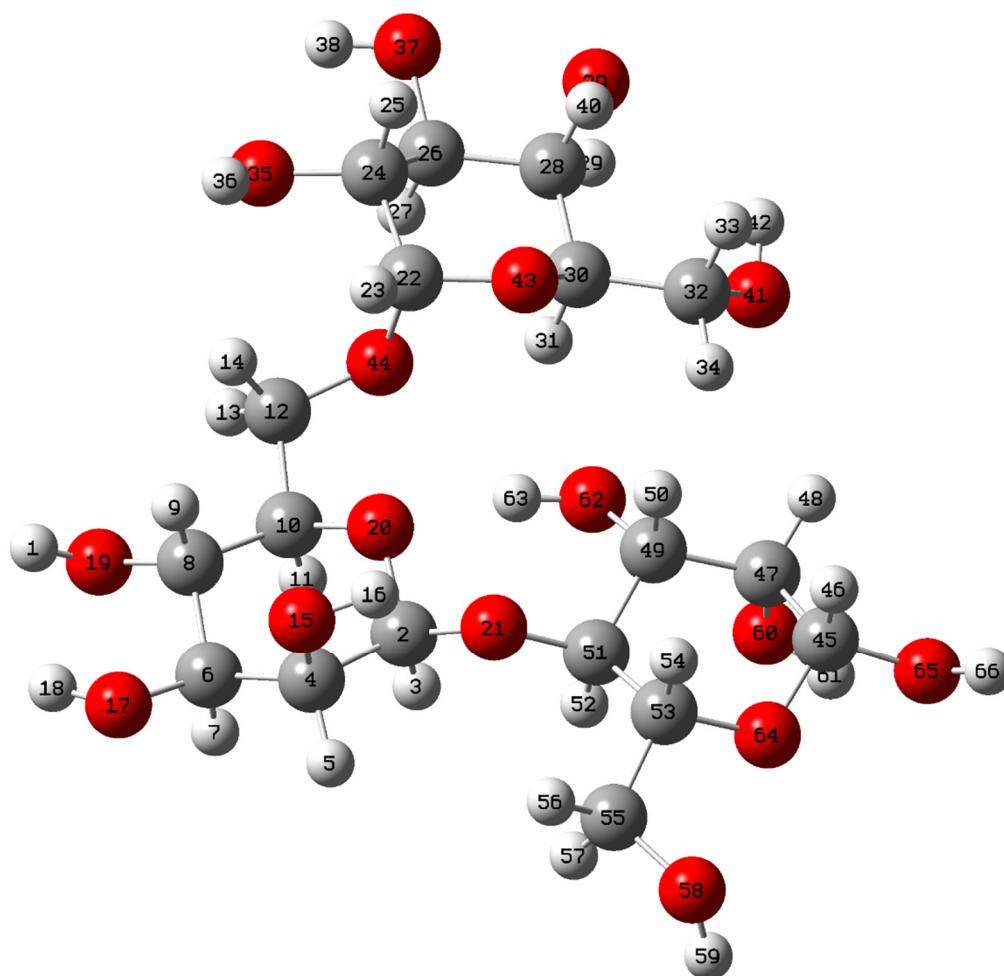

Figure S5. Guar gum monomer.

Table S1. Partial charges for PAM (polyacryl amide) polymer.

| N° | GAFF | Acrylamide Monomer |          |           |
|----|------|--------------------|----------|-----------|
|    |      | Initial            | Middle   | End       |
| 1  | hc   | 0.053927           | -        | -         |
| 2  | c3   | -0.196070          | -0.12354 | -0.020970 |
| 3  | hc   | 0.053927           | 0.06116  | 0.024827  |
| 4  | hc   | 0.053927           | 0.06116  | 0.024827  |
| 5  | c3   | -0.000670          | -0.03694 | -0.075570 |
| 6  | hc   | 0.055927           | 0.09786  | 0.043527  |
| 7  | c2   | 0.658327           | 0.54446  | 0.548827  |
| 8  | o    | -0.584270          | -0.52464 | -0.573370 |
| 9  | n    | -0.837470          | -0.83564 | -0.784070 |
| 10 | hn   | 0.371227           | 0.37806  | 0.384227  |
| 11 | hn   | 0.371227           | 0.37806  | 0.384227  |
| 12 | hc   | -                  | -        | 0.043527  |

**Table S2.** Partial charges for HPAM (hydrolyzed polyacryl amide) polymer.

| N° | GAFF | Acrylamide Monomer |           |           |
|----|------|--------------------|-----------|-----------|
|    |      | Initial            | Middle    | End       |
| 1  | hc   | 0.0357364          | 0         | -         |
| 2  | c3   | -0.132664          | -0.11691  | -         |
| 3  | hc   | 0.035736           | 0.05639   | -         |
| 4  | hc   | 0.035736           | 0.05639   | -         |
| 5  | c3   | 0.049636           | 0.02119   | -         |
| 6  | hc   | 0.029436           | 0.11039   | -         |
| 7  | c2   | 0.600436           | 0.51269   | -         |
| 8  | o    | -0.618564          | -0.55311  | -         |
| 9  | n    | -0.731564          | -0.83721  | -         |
| 10 | hn   | 0.348036           | 0.37509   | -         |
| 11 | hn   | 0.348036           | 0.37509   | -         |
| 12 | hc   | -                  | -         | -         |
| N° | GAFF | Acrylate Monomer   |           |           |
|    |      | Initial            | Middle    | End       |
| 1  | hc   | -                  | -         | -         |
| 2  | c3   | -                  | -0.050160 | 0.010522  |
| 3  | hc   | -                  | -0.017060 | -0.019180 |
| 4  | hc   | -                  | -0.017060 | -0.019180 |
| 5  | c3   | -                  | 0.023538  | 0.052822  |
| 6  | hc   | -                  | 0.018438  | -0.063280 |
| 7  | c2   | -                  | 0.528338  | 0.651622  |
| 8  | o2   | -                  | -0.716860 | -0.770080 |
| 9  | o2   | -                  | -0.769160 | -0.779980 |
| 10 | hc   | -                  | -         | -0.063280 |

**Table S3.** Partial charges for PAMPS (Acrylamido-2-methyl-1-propanesulfonic) polymer.

| N° | GAFF | Acrylamide Monomer                            |           |          |
|----|------|-----------------------------------------------|-----------|----------|
|    |      | Initial                                       | Middle    | End      |
| 1  | hc   | 0.0357364                                     | 0         | -        |
| 2  | c3   | -0.132664                                     | -0.11691  | -        |
| 3  | hc   | 0.035736                                      | 0.05639   | -        |
| 4  | hc   | 0.035736                                      | 0.05639   | -        |
| 5  | c3   | 0.049636                                      | 0.02119   | -        |
| 6  | hc   | 0.029436                                      | 0.11039   | -        |
| 7  | c2   | 0.600436                                      | 0.51269   | -        |
| 8  | o    | -0.618564                                     | -0.55311  | -        |
| 9  | n    | -0.731564                                     | -0.83721  | -        |
| 10 | hn   | 0.348036                                      | 0.37509   | -        |
| 11 | hn   | 0.348036                                      | 0.37509   | -        |
| 12 | hc   | -                                             | -         | -        |
| N° | GAFF | Acrylamido-2-methyl-1-propanesulfonic Monomer |           |          |
|    |      | Initial                                       | Middle    | End      |
| 1  | hc   | -                                             | -         | -        |
| 2  | c3   | -                                             | -0.142250 | -0.05840 |
| 3  | hc   | -                                             | 0.054548  | 0.039996 |
| 4  | hc   | -                                             | 0.054548  | 0.039996 |
| 5  | c3   | -                                             | 0.037048  | -0.11380 |
| 6  | hc   | -                                             | 0.032148  | 0.059296 |
| 7  | c2   | -                                             | 0.231348  | 0.412596 |
| 8  | o    | -                                             | -0.473750 | -0.5044  |
| 9  | n    | -                                             | 0.004148  | -0.4583  |
| 10 | hn   | -                                             | 0.012748  | 0.264696 |
| 11 | c3   | -                                             | 0.152748  | 0.297896 |
| 12 | c3   | -                                             | -0.154950 | -0.21540 |
| 13 | hc   | -                                             | 0.040848  | 0.051896 |
| 14 | hc   | -                                             | 0.040848  | 0.051896 |
| 15 | hc   | -                                             | 0.040848  | 0.051896 |
| 16 | c3   | -                                             | -0.217250 | -0.10250 |
| 17 | hc   | -                                             | 0.049048  | 0.022496 |
| 18 | hc   | -                                             | 0.049048  | 0.022496 |
| 19 | hc   | -                                             | 0.049048  | 0.022496 |
| 20 | c3   | -                                             | -0.003650 | -0.01090 |
| 21 | h1   | -                                             | 0.036948  | 0.029296 |
| 22 | h1   | -                                             | 0.036948  | 0.029296 |
| 23 | s6   | -                                             | 0.903748  | 0.936896 |
| 24 | o3   | -                                             | -0.611590 | -0.64290 |
| 25 | o3   | -                                             | -0.611590 | -0.64290 |
| 26 | o3   | -                                             | -0.611590 | -0.64290 |
| 27 | hc   | -                                             | -         | 0.059296 |

**Table S4.** Partial charges for PAA (polyacrylic acid) polymer.

| N° | GAFF | Acrylamide Monomer |          |     |
|----|------|--------------------|----------|-----|
|    |      | Initial            | Middle   | End |
| 1  | hc   | 0.0357364          | 0        | -   |
| 2  | c3   | -0.132664          | -0.11691 | -   |
| 3  | hc   | 0.035736           | 0.05639  | -   |
| 4  | hc   | 0.035736           | 0.05639  | -   |
| 5  | c3   | 0.049636           | 0.02119  | -   |
| 6  | hc   | 0.029436           | 0.11039  | -   |
| 7  | c2   | 0.600436           | 0.51269  | -   |
| 8  | o    | -0.618564          | -0.55311 | -   |
| 9  | n    | -0.731564          | -0.83721 | -   |
| 10 | hn   | 0.348036           | 0.37509  | -   |
| 11 | hn   | 0.348036           | 0.37509  | -   |
| 12 | hc   | -                  | -        | -   |

**Table S5.** Partial charges for PEO (polyethylene oxide) polymer.

| N° | GAFF | Ethylene oxide Monomer |          |           |
|----|------|------------------------|----------|-----------|
|    |      | Initial                | Middle   | End       |
| 1  | ho   | 0.430233               | -        | -         |
| 2  | os   | -0.674770              | -0.46604 | -0.458390 |
| 3  | c3   | 0.171333               | 0.174257 | 0.215506  |
| 4  | h1   | 0.021833               | 0.024357 | 0.015906  |
| 5  | h1   | 0.021833               | 0.024357 | 0.015906  |
| 6  | c3   | 0.233133               | 0.200957 | 0.169506  |
| 7  | h1   | 0.028633               | 0.021057 | 0.017706  |
| 8  | h1   | 0.028633               | 0.021057 | 0.017706  |
| 9  | os   | -0.479070              | -0.46604 | -0.48349  |
| 10 | c3   | 0.167633               | 0.174257 | 0.237206  |
| 11 | h1   | 0.020533               | 0.024357 | 0.025006  |
| 12 | h1   | 0.020533               | 0.024357 | 0.025006  |
| 13 | c3   | 0.210833               | 0.200957 | 0.176206  |
| 14 | h1   | 0.019333               | 0.021057 | 0.018106  |
| 15 | h1   | 0.019333               | 0.021057 | 0.018106  |
| 16 | oh   | -                      | -        | -0.67809  |
| 17 | ho   | -                      | -        | 0.428106  |

**Table S6.** Partial charges for GUM (guar gum polysaccharide) polymer.

| N° | GAFF | guar gum Monomer |           |          |
|----|------|------------------|-----------|----------|
|    |      | Initial          | Middle    | End      |
| 1  | ho   | 0.410488         | -         | -        |
| 2  | c3   | -0.12431         | -0.02373  | -0.06825 |
| 3  | h2   | 0.142488         | 0.144875  | 0.153648 |
| 4  | c3   | 0.113688         | 0.050775  | 0.073148 |
| 5  | h1   | 0.107588         | 0.121575  | 0.109348 |
| 6  | c3   | 0.072688         | 0.053875  | 0.043348 |
| 7  | h1   | 0.099188         | 0.101475  | 0.113548 |
| 8  | c3   | 0.125288         | 0.002375  | -0.01775 |
| 9  | h1   | 0.110288         | 0.171675  | 0.170448 |
| 10 | c3   | -0.009710        | -0.016330 | -0.05135 |
| 11 | h1   | 0.128188         | 0.117775  | 0.113048 |
| 12 | c3   | -0.045510        | -0.080330 | 0.006448 |
| 13 | h1   | 0.087488         | 0.090775  | 0.099348 |
| 14 | h1   | 0.087488         | 0.090775  | 0.099348 |
| 15 | oh   | -0.538410        | -0.533930 | -0.51665 |
| 16 | ho   | 0.390988         | 0.405175  | 0.386948 |
| 17 | oh   | -0.558210        | -0.521330 | -0.51745 |
| 18 | ho   | 0.390688         | 0.365675  | 0.351648 |
| 19 | oh   | -0.592710        | -0.233930 | -0.20525 |
| 20 | os   | -0.186910        | -0.193530 | -0.18075 |
| 21 | os   | -0.220210        | -0.261030 | -0.24005 |
| 22 | c3   | 0.054388         | 0.161775  | 0.112748 |
| 23 | h2   | 0.145888         | 0.113175  | 0.152848 |
| 24 | c3   | 0.041488         | 0.069675  | 0.126748 |
| 25 | h1   | 0.119988         | 0.075675  | 0.105648 |
| 26 | c3   | 0.094888         | 0.087275  | 0.092848 |
| 27 | h1   | 0.118788         | 0.073275  | 0.071348 |
| 28 | c3   | 0.039188         | 0.120675  | 0.061548 |
| 29 | h1   | 0.103988         | 0.137075  | 0.131548 |
| 30 | c3   | 0.036788         | 0.011875  | -0.00365 |
| 31 | h1   | 0.162588         | 0.054575  | 0.106348 |
| 32 | c3   | -0.054310        | 0.031175  | 0.073748 |
| 33 | h1   | 0.108688         | 0.090975  | 0.083448 |
| 34 | h1   | 0.108688         | 0.090975  | 0.083448 |
| 35 | oh   | -0.605410        | -0.531930 | -0.61905 |
| 36 | ho   | 0.424988         | 0.331875  | 0.403748 |
| 37 | oh   | -0.606010        | -0.598130 | -0.59705 |
| 38 | ho   | 0.429288         | 0.412975  | 0.401548 |
| 39 | oh   | -0.507510        | -0.562430 | -0.57485 |
| 40 | ho   | 0.391088         | 0.416875  | 0.420048 |
| 41 | oh   | -0.472710        | -0.574030 | -0.60865 |
| 42 | ho   | 0.346988         | 0.403975  | 0.409548 |

Table S6. Cont.

| N° | GAFF | Acrylamide Monomer |          |          |
|----|------|--------------------|----------|----------|
|    |      | Initial            | Middle   | End      |
| 43 | os   | -0.34701           | -0.39553 | -0.40995 |
| 44 | os   | -0.18771           | -0.10103 | -0.21825 |
| 45 | c3   | -0.02581           | -0.13353 | 0.140948 |
| 46 | h2   | 0.109988           | 0.131975 | 0.094048 |
| 47 | c3   | 0.006188           | -0.04473 | 0.062048 |
| 48 | h1   | 0.108488           | 0.189775 | 0.116148 |
| 49 | c3   | 0.102988           | 0.124675 | -0.00345 |
| 50 | h1   | 0.081888           | 0.103675 | 0.105948 |
| 51 | c3   | 0.000787           | -0.01603 | -0.01845 |
| 52 | h1   | 0.162688           | 0.156475 | 0.155948 |
| 53 | c3   | -0.04491           | -0.02573 | 0.009648 |
| 54 | h1   | 0.114088           | 0.113575 | 0.103248 |
| 55 | c3   | 0.113288           | 0.117175 | 0.102948 |
| 56 | h1   | 0.066188           | 0.065675 | 0.076648 |
| 57 | h1   | 0.066188           | 0.065675 | 0.076648 |
| 58 | oh   | -0.59591           | -0.59513 | -0.60495 |
| 59 | ho   | 0.387988           | 0.380675 | 0.391048 |
| 60 | oh   | -0.54341           | -0.53463 | -0.53145 |
| 61 | ho   | 0.406388           | 0.398975 | 0.407248 |
| 62 | oh   | -0.47311           | -0.47653 | -0.49895 |
| 63 | ho   | 0.287888           | 0.292975 | 0.383448 |
| 64 | os   | -0.14941           | -0.08853 | -0.27275 |
| 65 | oh   | -                  | -        | -0.57525 |
| 66 | ho   | -                  | -        | 0.430848 |

Table S7. Atom type.

| Atom type | Definition                                          |
|-----------|-----------------------------------------------------|
| c2        | Sp2 aliphatic carbon                                |
| c3        | Sp3 aliphatic carbon                                |
| ho        | Hydroxyl hydrogen                                   |
| hn        | Amine/amide hydrogen                                |
| h1        | Aliphatic hydrogen with 1 electro withdrawing group |
| h2        | Aliphatic hydrogen with 2 electro withdrawing group |
| hc        | Aliphatic hydrogen                                  |
| o         | Carbonyl oxygen                                     |
| o2        | Carboxylate oxygen                                  |
| o3        | Sulfonate oxygen                                    |
| os        | Bridging oxygen                                     |
| oh        | Hydroxide oxygen                                    |
| n         | Amine/amide nitrogen                                |
| s6        | Sulfonate sulfur                                    |
